# Supplementary material for: Decellularized Aortic Scaffold Alleviates H2O2‐Induced Inflammation and Apoptosis in CD34+ Progenitor Cells While Driving Neovasculogenesis
Source: Hindawi journal article supplement (doi:10.1155/2020/6782072), 2020-01-01
Supplement: f1 [file 6782072.f1.pdf]

**Supplementary Table S1. The information of patients who provided aortic tissues.**

| Patient number | Sex    | Age | Diagnosis                                                                                              | Sample                |
|----------------|--------|-----|--------------------------------------------------------------------------------------------------------|-----------------------|
| 1              | male   | 60  | coronary disease                                                                                       | Aortic wall           |
| 2              | male   | 50  | coronary disease; inferior wall myocardial infarction                                                  | Aortic wall           |
| 3              | male   | 64  | coronary disease                                                                                       | Aortic wall           |
| 4              | female | 59  | ascend aortic aneurysm; aortic regurgitation; mitral regurgitation; Bentall's operation                | Ascending aortic wall |
| 5              | male   | 60  | coronary disease; percutaneous coronary intervention (PCI) and Off-pump coronary artery bypass (OPCAB) | Aortic wall           |
| 6              | male   | 44  | aortic dissection (Debakey I )                                                                         | Aortic wall           |
| 7              | female | 27  | ascend aortic aneurysm; aortic insufficiency; Marfan syndrome                                          | Aortic wall           |
| 8              | female | 56  | aortic dissection (Debakey I )                                                                         | Aortic wall           |

**Supplementary Table S2. Cytokine secretion profile of CD34<sup>+</sup> EPC exposed to H<sub>2</sub>O<sub>2</sub> for 48 hours.**

The presence and relative levels of a total of 120 cytokines in Control group and aortic scaffold group were screened using a commercially available cytokine antibody array C series 1000 (Ray Biotech, USA). The expression of each cytokine was measured by chemiluminescence intensity by Image Quant LAS4000 Scanner (GE Healthcare Corporate). The fold-increase over Control group was expressed in column 3 (Scaffold group / Control group), values were the average of three experiments.

| Cytokines    | Control group | Scaffold group | Fold-increase | Cytokines      | Control group | Scaffold group | Fold-increase |
|--------------|---------------|----------------|---------------|----------------|---------------|----------------|---------------|
| Angiogenin   | 237           | 194            | 0.82          | Acrp30         | 1595          | 1616           | 1.01          |
| BDNF         | 1009          | 956            | 0.95          | AgRP           | 767           | 744            | 0.97          |
| BLC          | 350           | 312            | 0.89          | Angiopoietin-2 | 1363          | 1351           | 0.99          |
| BMP-4        | 871           | 709            | 0.81          | Amphiregulin   | 364           | 355            | 0.98          |
| BMP-6        | 351           | 290            | 0.83          | axl            | 228           | 195            | 0.85          |
| CK beta 8-1  | 1015          | 868            | 0.86          | bFGF           | 1790          | 1543           | 0.86          |
| CNTF         | 753           | 633            | 0.84          | Beta-NGF       | 209           | 171            | 0.82          |
| EGF          | 457           | 339            | 0.74          | BTC            | 567           | 496            | 0.87          |
| Eotaxin      | 465           | 242            | 0.52          | CCL28          | 218           | 122            | 0.56          |
| Eotaxin-2    | 544           | 536            | 0.98          | CTACK          | 3594          | 3981           | 1.11          |
| Eotaxin-3    | 683           | 751            | 1.10          | dtk            | 526           | 644            | 1.23          |
| FGF-6        | 837           | 1011           | 1.21          | EGF-R          | 147           | 168            | 1.15          |
| FGF-7        | 417           | 479            | 1.15          | ENA-78         | 539           | 520            | 0.96          |
| Flt-3 Ligand | 498           | 506            | 1.02          | Fas/TNFRSF6    | 594           | 687            | 1.16          |
| Fractalkine  | 654           | 658            | 1.01          | FGF-4          | 491           | 446            | 0.91          |
| GCP-2        | 565           | 530            | 0.94          | FGF-9          | 2237          | 2207           | 0.99          |
| GDNF         | 602           | 586            | 0.97          | G-CSF          | 786           | 820            | 1.04          |
| GM-CSF       | 118           | 73             | 0.62          | GITR ligand    | 455           | 429            | 0.94          |
| I-309        | 278           | 240            | 0.86          | GITR           | 324           | 314            | 0.97          |
| IFN-gamma    | 266           | 236            | 0.89          | GRO            | 5143          | 1974           | 0.38          |
| IGFBP-1      | 315           | 268            | 0.85          | GRO-alpha      | 2679          | 750            | 0.28          |
| IGFBP-2      | 841           | 715            | 0.85          | HCC-4          | 355           | 376            | 1.06          |
| IGFBP-4      | 587           | 417            | 0.71          | HGF            | 123           | 124            | 1.00          |
| IGF-I        | 414           | 305            | 0.74          | ICAM-1         | 777           | 674            | 0.87          |
| IL-10        | 95            | 93             | 0.98          | ICAM-3         | 293           | 320            | 1.09          |
| IL-13        | 125           | 139            | 1.11          | IGF-BP-3       | 1376          | 1532           | 1.11          |
| IL-15        | 488           | 503            | 1.03          | IGF-BP-6       | 1943          | 2053           | 1.06          |

|             |      |      |      |                 |       |      |      |
|-------------|------|------|------|-----------------|-------|------|------|
| IL-16       | 506  | 540  | 1.07 | IGF-1 SR        | 548   | 635  | 1.16 |
| IL-1alpha   | 357  | 346  | 0.97 | IL-1 R4/ST2     | 2385  | 2822 | 1.18 |
| IL-1beta    | 594  | 672  | 1.13 | IL-1 RI         | 287   | 354  | 1.23 |
| IL-1ra      | 1266 | 1391 | 1.10 | IL11            | 309   | 314  | 1.02 |
| IL-2        | 66   | 459  | 6.91 | IL12-p40        | 1429  | 1362 | 0.95 |
| IL-3        | 541  | 530  | 0.98 | IL12-p70        | 505   | 417  | 0.83 |
| IL-4        | 349  | 389  | 1.12 | IL17            | 206   | 229  | 1.11 |
| IL-5        | 118  | 123  | 1.04 | IL-2 Ra         | 333   | 252  | 0.76 |
| IL-6        | 71   | 84   | 1.19 | IL-6 R          | 446   | 315  | 0.71 |
| IL-7        | 94   | 107  | 1.15 | IL-8            | 8395  | 3847 | 0.46 |
| Leptin      | 551  | 456  | 0.83 | I-TAC           | 928   | 1041 | 1.12 |
| LIGHT       | 608  | 491  | 0.81 | Lymphotactin    | 1365  | 1440 | 1.05 |
| MCP-1       | 1204 | 1169 | 0.97 | MIF             | 876   | 867  | 0.99 |
| MCP-2       | 467  | 488  | 1.05 | MIP-1-alpha     | 5604  | 4986 | 0.89 |
| MCP-3       | 261  | 307  | 1.17 | MIP-1-beta      | 12144 | 7650 | 0.63 |
| MCP-4       | 315  | 329  | 1.05 | MIP-3-beta      | 1269  | 1434 | 1.13 |
| M-CSF       | 666  | 726  | 1.09 | MSP-a           | 224   | 227  | 1.01 |
| MDC         | 661  | 814  | 1.23 | NT-4            | 301   | 294  | 0.98 |
| MIG         | 146  | 172  | 1.18 | Osteoprotegerin | 574   | 664  | 1.16 |
| MIP-1-delta | 221  | 242  | 1.09 | Oncostatin M    | 3058  | 3016 | 0.99 |
| MIP-3-alpha | 243  | 256  | 1.06 | PIGF            | 283   | 249  | 0.88 |
| NAP-2       | 718  | 766  | 1.07 | sgp130          | 405   | 405  | 1.00 |
| NT-3        | 1216 | 1104 | 0.91 | sTNF RII        | 1083  | 905  | 0.84 |
| PARC        | 886  | 655  | 0.74 | sTNF-RI         | 694   | 512  | 0.74 |
| PDGF-BB     | 735  | 637  | 0.87 | TECK            | 658   | 696  | 1.06 |
| RANTES      | 763  | 718  | 0.94 | TIMP-1          | 3416  | 3173 | 0.93 |
| SCF         | 529  | 553  | 1.05 | TIMP-2          | 882   | 520  | 0.59 |
| SDF-1       | 414  | 458  | 1.10 | TPO             | 1315  | 1301 | 0.99 |
| TARC        | 578  | 687  | 1.19 | TRAIL-R3        | 462   | 511  | 1.11 |
| TGF-beta 1  | 284  | 309  | 1.09 | TRAIL-R4        | 340   | 376  | 1.11 |
| TGF-beta    | 406  | 1502 | 3.7  | uPAR            | 664   | 562  | 0.85 |
| TNF-alpha   | 152  | 187  | 1.23 | VEGF            | 2077  | 1950 | 0.94 |
| TNF-beta    | 312  | 375  | 1.20 | VEGF-D          | 1278  | 1374 | 1.08 |
